# Supplementary material
Source: publisher site journal article supplement (https://www.spandidos-publications.com/7972/downloadSupplementary)
Supplement: Supplementary file 1 [file downloadSupplementary]

## Sheet: Sheet1
Table SIII. STRING interactions
#node1	node2	node1 string ID	node2 string ID	Neighborhood on chromosome	Gene fusion	Phylogenetic co-occurrence	homology	co-expression	Experimentally determined interaction	Database annotated	Automated textmining	Combined score
ACTN2	CTNNB1	9606.ENSP00000443495	9606.ENSP00000344456	0	0	0	0	0.062	0.244	0	0.302	0.462
ACTN2	AQP4	9606.ENSP00000443495	9606.ENSP00000372654	0	0	0	0	0.332	0.058	0	0.304	0.523
ACTN2	NRG1	9606.ENSP00000443495	9606.ENSP00000384620	0	0	0	0	0	0	0.5	0.073	0.517
ANKRD34A	GJA3	9606.ENSP00000475189	9606.ENSP00000241125	0	0	0	0	0	0	0	0.413	0.413
ANKRD34A	XKR4	9606.ENSP00000475189	9606.ENSP00000328326	0	0	0	0	0.062	0	0	0.511	0.522
ANKRD34A	TMEM35	9606.ENSP00000475189	9606.ENSP00000362021	0	0	0	0	0.063	0	0	0.45	0.463
ANO3	ARPP21	9606.ENSP00000256737	9606.ENSP00000412326	0	0	0	0	0.192	0	0	0.357	0.458
AP4E1	SNX14	9606.ENSP00000261842	9606.ENSP00000313121	0	0	0	0	0.125	0	0	0.359	0.415
AP4E1	PIK3C2A	9606.ENSP00000261842	9606.ENSP00000265970	0	0	0	0	0.066	0.06	0.9	0.063	0.906
AP4E1	NECAP1	9606.ENSP00000261842	9606.ENSP00000341737	0	0	0	0	0.049	0.143	0.9	0.077	0.914
APBB2	SLC44A5	9606.ENSP00000427211	9606.ENSP00000359892	0	0	0	0	0	0	0	0.575	0.575
APBB2	HTATIP2	9606.ENSP00000427211	9606.ENSP00000392985	0	0	0	0	0	0	0	0.416	0.416
AQP4	GJA3	9606.ENSP00000372654	9606.ENSP00000241125	0	0	0	0	0	0	0	0.407	0.407
AQP4	SNAP25	9606.ENSP00000372654	9606.ENSP00000254976	0	0	0	0	0.382	0	0	0.293	0.544
AQP4	NTRK2	9606.ENSP00000372654	9606.ENSP00000277120	0	0	0	0	0.39	0.056	0	0.234	0.52
AQP4	HTR5A	9606.ENSP00000372654	9606.ENSP00000287907	0	0	0	0	0.474	0	0	0.046	0.476
ARPC1A	WIPF2	9606.ENSP00000262942	9606.ENSP00000320924	0	0	0	0	0.062	0.102	0.6	0.211	0.698
ARPC1A	NCKAP1	9606.ENSP00000262942	9606.ENSP00000354251	0	0	0	0	0.063	0	0.6	0.289	0.71
ARPP21	EIF4G1	9606.ENSP00000412326	9606.ENSP00000416255	0	0	0	0	0.064	0	0	0.456	0.469
ARX	PIK3C2A	9606.ENSP00000368332	9606.ENSP00000265970	0	0	0	0	0	0.505	0	0.042	0.506
ARX	JPH3	9606.ENSP00000368332	9606.ENSP00000284262	0	0	0	0	0.069	0	0	0.424	0.44
ARX	PAFAH1B1	9606.ENSP00000368332	9606.ENSP00000380378	0	0	0	0	0.062	0	0	0.47	0.481
ATAD2B	FAF1	9606.ENSP00000238789	9606.ENSP00000379457	0	0	0	0	0.063	0.345	0	0.112	0.407
ATAD2B	UBA52	9606.ENSP00000238789	9606.ENSP00000388107	0	0	0	0	0.062	0.363	0	0.114	0.424
ATAD2B	UBD	9606.ENSP00000238789	9606.ENSP00000366249	0	0	0	0	0.064	0.369	0	0.108	0.427
ATAD2B	UBQLN2	9606.ENSP00000238789	9606.ENSP00000345195	0	0	0	0	0.082	0.369	0	0.151	0.465
ATAD2B	PSMA5	9606.ENSP00000238789	9606.ENSP00000271308	0	0	0	0	0.228	0.368	0	0.14	0.543
ATAD2B	BIVM	9606.ENSP00000238789	9606.ENSP00000257336	0	0	0	0	0	0	0	0.58	0.58
ATAD2B	PHIP	9606.ENSP00000238789	9606.ENSP00000275034	0	0	0	0.539	0.739	0.06	0	0.349	0.782
ATM	H3F3B	9606.ENSP00000278616	9606.ENSP00000254810	0	0	0	0	0	0.143	0	0.33	0.401
ATM	TAOK1	9606.ENSP00000278616	9606.ENSP00000261716	0	0	0	0	0.134	0	0.9	0.123	0.917
ATM	PIK3C2A	9606.ENSP00000278616	9606.ENSP00000265970	0	0	0	0	0.122	0.318	0	0.23	0.499
ATM	IGF1R	9606.ENSP00000278616	9606.ENSP00000268035	0	0	0	0	0	0.056	0	0.458	0.467
ATM	CCNA2	9606.ENSP00000278616	9606.ENSP00000274026	0	0	0	0	0.062	0.064	0.6	0.63	0.852
ATM	HOMER1	9606.ENSP00000278616	9606.ENSP00000334382	0	0	0	0	0	0	0	0.438	0.438
ATM	HTATIP2	9606.ENSP00000278616	9606.ENSP00000392985	0	0	0	0	0	0	0	0.453	0.454
ATM	RNF115	9606.ENSP00000278616	9606.ENSP00000463650	0	0	0	0	0.062	0	0	0.456	0.468
ATM	MCM9	9606.ENSP00000278616	9606.ENSP00000314505	0	0	0	0	0.083	0	0	0.46	0.483
ATM	PARP3	9606.ENSP00000278616	9606.ENSP00000381740	0	0	0	0	0.064	0	0	0.485	0.498
ATM	XIAP	9606.ENSP00000278616	9606.ENSP00000360242	0	0	0	0	0.072	0	0	0.482	0.499
ATM	SMG7	9606.ENSP00000278616	9606.ENSP00000425133	0	0	0	0	0.049	0.093	0	0.485	0.517
ATM	CTNNB1	9606.ENSP00000278616	9606.ENSP00000344456	0	0	0	0	0	0	0	0.63	0.63
ATM	CREB1	9606.ENSP00000278616	9606.ENSP00000387699	0	0	0	0	0.062	0.463	0	0.419	0.682
ATM	CDC45	9606.ENSP00000278616	9606.ENSP00000405726	0	0	0	0	0.062	0	0	0.778	0.783
ATM	UBA52	9606.ENSP00000278616	9606.ENSP00000388107	0	0	0	0	0	0	0.9	0.061	0.902
ATM	ATMIN	9606.ENSP00000278616	9606.ENSP00000299575	0	0	0	0	0	0.486	0	0.82	0.904
ATM	TAOK3	9606.ENSP00000278616	9606.ENSP00000376317	0	0	0	0	0.093	0.27	0.9	0.067	0.929
ATOX1	PEBP1	9606.ENSP00000430598	9606.ENSP00000261313	0	0	0	0	0.115	0.378	0	0.069	0.443
ATOX1	ATP7A	9606.ENSP00000430598	9606.ENSP00000345728	0	0	0	0	0	0.975	0.9	0.994	0.999
ATOX1	UBE2L3	9606.ENSP00000430598	9606.ENSP00000400906	0	0	0	0	0.063	0.703	0	0	0.709
ATP7A	CRMP1	9606.ENSP00000345728	9606.ENSP00000321606	0	0	0	0	0	0	0	0.448	0.448
ATP7A	EIF4G1	9606.ENSP00000345728	9606.ENSP00000416255	0	0	0	0	0	0	0	0.987	0.987
BAK1	IGFBP4	9606.ENSP00000363591	9606.ENSP00000269593	0	0	0	0	0	0	0	0.43	0.43
BAK1	XIAP	9606.ENSP00000363591	9606.ENSP00000360242	0	0	0	0	0	0.063	0	0.4	0.414
BAK1	RAB23	9606.ENSP00000363591	9606.ENSP00000417610	0	0	0	0	0.155	0	0	0.363	0.438
BET1	TMEM106B	9606.ENSP00000222547	9606.ENSP00000379901	0	0	0	0	0.165	0	0	0.326	0.414
BET1	NAPG	9606.ENSP00000222547	9606.ENSP00000324628	0	0	0	0	0	0.246	0.6	0.223	0.745
BET1	SNAP25	9606.ENSP00000222547	9606.ENSP00000254976	0	0	0	0	0.062	0.149	0.54	0.439	0.766
BMPR1A	CHRD	9606.ENSP00000361107	9606.ENSP00000204604	0	0	0	0	0	0.121	0.9	0.746	0.975
BMPR1A	SMAD6	9606.ENSP00000361107	9606.ENSP00000288840	0	0	0	0	0.062	0.494	0.9	0.753	0.986
BMPR1A	REL	9606.ENSP00000361107	9606.ENSP00000295025	0	0	0	0	0	0.103	0	0.435	0.472
BMPR1A	PTN	9606.ENSP00000361107	9606.ENSP00000341170	0	0	0	0	0	0	0	0.651	0.651
BMPR1A	CTNNB1	9606.ENSP00000361107	9606.ENSP00000344456	0	0	0	0	0.064	0.303	0	0.539	0.673
BMPR1A	XIAP	9606.ENSP00000361107	9606.ENSP00000360242	0	0	0	0	0.062	0.116	0.9	0.473	0.95
BMPR1A	RUNX2	9606.ENSP00000361107	9606.ENSP00000360493	0	0	0	0	0	0.27	0	0.625	0.714
BMPR1A	UBE2L3	9606.ENSP00000361107	9606.ENSP00000400906	0	0	0	0	0	0.067	0	0.385	0.401
BMPR1A	SMAD9	9606.ENSP00000361107	9606.ENSP00000369154	0	0	0	0	0.062	0.26	0.9	0.706	0.976
BNC2	GPR25	9606.ENSP00000370047	9606.ENSP00000301917	0	0	0	0	0	0	0	0.61	0.61
BOLA1	FAM96B	9606.ENSP00000358149	9606.ENSP00000387471	0	0	0	0	0.108	0	0	0.377	0.421
BOLA1	LYRM4	9606.ENSP00000358149	9606.ENSP00000420026	0	0	0	0	0.062	0	0	0.617	0.625
BTF3L4	UBA52	9606.ENSP00000360664	9606.ENSP00000388107	0	0	0	0	0.367	0.252	0	0	0.506
BTF3L4	RPS29	9606.ENSP00000360664	9606.ENSP00000379339	0	0	0	0	0.644	0.252	0	0	0.722
BVES	ICMT	9606.ENSP00000313172	9606.ENSP00000343552	0	0	0	0	0	0	0	0.475	0.475
C10orf11	PYROXD1	9606.ENSP00000361577	9606.ENSP00000240651	0	0	0	0	0	0	0	0.496	0.496
C10orf11	DHX40	9606.ENSP00000361577	9606.ENSP00000251241	0	0	0	0	0	0.369	0	0.183	0.462
C10orf11	NAA38	9606.ENSP00000361577	9606.ENSP00000332103	0	0	0	0	0	0.616	0	0.212	0.684
C10orf11	SNRNP70	9606.ENSP00000361577	9606.ENSP00000472998	0	0	0	0	0	0.702	0	0.375	0.805
C11orf58	LYRM4	9606.ENSP00000228136	9606.ENSP00000420026	0	0	0	0	0	0	0	0.456	0.456
C11orf58	SHFM1	9606.ENSP00000228136	9606.ENSP00000481021	0	0	0	0	0	0	0	0.663	0.663
C18orf21	CCDC178	9606.ENSP00000465517	9606.ENSP00000372576	0	0	0	0	0	0	0	0.558	0.558
C1QL3	KCNS1	9606.ENSP00000298943	9606.ENSP00000307694	0	0	0	0	0.139	0	0	0.39	0.452
C1orf123	ROBO1	9606.ENSP00000294360	9606.ENSP00000420321	0	0	0	0	0	0.67	0	0	0.67
C1orf123	CDC45	9606.ENSP00000294360	9606.ENSP00000405726	0	0	0	0	0	0.698	0	0	0.698
C7orf49	OSTF1	9606.ENSP00000376823	9606.ENSP00000340836	0	0	0	0	0	0	0	0.476	0.476
CAMSAP2	SLAIN2	9606.ENSP00000236925	9606.ENSP00000264313	0	0	0	0	0.049	0	0	0.408	0.413
CAMSAP2	HOMER1	9606.ENSP00000236925	9606.ENSP00000334382	0	0	0	0	0.098	0	0	0.432	0.466
CBWD7	FAM72B	9606.ENSP00000366608	9606.ENSP00000358397	0	0	0	0	0	0	0	0.532	0.532
CBWD7	FAM72D	9606.ENSP00000366608	9606.ENSP00000383682	0	0	0	0	0	0	0	0.517	0.517
CBWD7	FAM72C	9606.ENSP00000366608	9606.ENSP00000463032	0	0	0	0	0	0	0	0.569	0.569
CCDC144NL	ZXDB	9606.ENSP00000328054	9606.ENSP00000364023	0	0	0	0	0	0	0	0.607	0.607
CCNA2	CCNI	9606.ENSP00000274026	9606.ENSP00000237654	0	0	0	0	0.065	0.181	0.54	0.483	0.793
CCNA2	CCNT1	9606.ENSP00000274026	9606.ENSP00000261900	0	0	0	0	0.081	0.077	0.9	0.533	0.955
CCNA2	TCF3	9606.ENSP00000274026	9606.ENSP00000262965	0	0	0	0	0.122	0.151	0	0.311	0.442
CCNA2	IGF1R	9606.ENSP00000274026	9606.ENSP00000268035	0	0	0	0	0.062	0.103	0	0.373	0.426
CCNA2	HNRNPAB	9606.ENSP00000274026	9606.ENSP00000351108	0	0	0	0	0.153	0.104	0	0.295	0.418
CCNA2	CREB1	9606.ENSP00000274026	9606.ENSP00000387699	0	0	0	0	0.062	0	0	0.414	0.426
CCNA2	MCM9	9606.ENSP00000274026	9606.ENSP00000314505	0	0	0	0	0.269	0.165	0	0.213	0.478
CCNA2	XIAP	9606.ENSP00000274026	9606.ENSP00000360242	0	0	0	0	0.062	0.144	0	0.526	0.586
CCNA2	UBA52	9606.ENSP00000274026	9606.ENSP00000388107	0	0	0	0	0	0	0.6	0	0.6
CCNA2	CTNNB1	9606.ENSP00000274026	9606.ENSP00000344456	0	0	0	0	0.054	0.33	0	0.561	0.697
CCNA2	PPP2R2A	9606.ENSP00000274026	9606.ENSP00000325074	0	0	0	0	0	0.072	0.65	0.223	0.725
CCNA2	KIF20B	9606.ENSP00000274026	9606.ENSP00000360793	0	0	0	0	0.74	0.139	0	0.19	0.803
CCNA2	HELLS	9606.ENSP00000274026	9606.ENSP00000377601	0	0	0	0	0.753	0.117	0	0.252	0.822
CCNA2	CDC45	9606.ENSP00000274026	9606.ENSP00000405726	0	0	0	0	0.818	0.078	0	0.603	0.927
CCNI	CCNT1	9606.ENSP00000237654	9606.ENSP00000261900	0	0	0	0	0.062	0.077	0.54	0.141	0.612
CCNT1	SETD7	9606.ENSP00000261900	9606.ENSP00000274031	0	0	0	0	0.083	0	0	0.437	0.462
CCNT1	POU2F1	9606.ENSP00000261900	9606.ENSP00000356840	0	0	0	0	0.073	0	0.6	0.06	0.621
CD84	CXCR5	9606.ENSP00000312367	9606.ENSP00000292174	0	0	0	0	0.062	0	0	0.517	0.527
CDC45	MCM9	9606.ENSP00000405726	9606.ENSP00000314505	0	0	0	0	0.445	0.787	0	0.654	0.955
CDC45	KIF20B	9606.ENSP00000405726	9606.ENSP00000360793	0	0	0	0	0.349	0	0	0.268	0.503
CDC45	HELLS	9606.ENSP00000405726	9606.ENSP00000377601	0	0	0	0	0.613	0.098	0	0.075	0.65
CEACAM1	CTNNB1	9606.ENSP00000161559	9606.ENSP00000344456	0	0	0	0	0	0	0	0.971	0.971
CETN3	UBQLN2	9606.ENSP00000428259	9606.ENSP00000345195	0	0	0	0	0.051	0.078	0	0.48	0.506
CETN3	PHKA1	9606.ENSP00000428259	9606.ENSP00000362643	0	0	0	0	0	0.124	0	0.605	0.639
CETN3	SHFM1	9606.ENSP00000428259	9606.ENSP00000481021	0	0	0	0	0.063	0	0	0.917	0.919
CHD6	NCOR1	9606.ENSP00000362330	9606.ENSP00000268712	0	0	0	0	0.185	0.078	0	0.357	0.474
CHD6	HELLS	9606.ENSP00000362330	9606.ENSP00000377601	0	0	0	0.755	0.146	0.31	0	0.237	0.416
CHD6	LDB1	9606.ENSP00000362330	9606.ENSP00000392466	0	0	0	0	0.146	0.062	0	0.458	0.528
CHRD	FSTL4	9606.ENSP00000204604	9606.ENSP00000265342	0	0	0	0	0.062	0	0	0.404	0.417
CHRD	COL4A5	9606.ENSP00000204604	9606.ENSP00000331902	0	0	0	0	0.063	0.244	0	0.256	0.426
CHRD	NCAM1	9606.ENSP00000204604	9606.ENSP00000480132	0	0	0	0	0.088	0	0	0.434	0.462
CHRD	SIX3	9606.ENSP00000204604	9606.ENSP00000260653	0	0	0	0	0	0	0	0.486	0.486
CHRD	EGR2	9606.ENSP00000204604	9606.ENSP00000242480	0	0	0	0	0	0	0	0.502	0.502
CHRD	SMAD9	9606.ENSP00000204604	9606.ENSP00000369154	0	0	0	0	0	0.17	0	0.563	0.622
CHRD	CTNNB1	9606.ENSP00000204604	9606.ENSP00000344456	0	0	0	0	0	0	0	0.695	0.695
CHRD	SMAD6	9606.ENSP00000204604	9606.ENSP00000288840	0	0	0	0	0	0.17	0	0.651	0.698
CHRD	TLL2	9606.ENSP00000204604	9606.ENSP00000350630	0	0	0	0	0.062	0.524	0	0.89	0.946
CHRNB2	GABBR2	9606.ENSP00000357461	9606.ENSP00000259455	0	0	0	0	0.12	0	0	0.523	0.562
CHRNB2	NTRK2	9606.ENSP00000357461	9606.ENSP00000277120	0	0	0	0	0.138	0.056	0	0.333	0.41
CHRNB2	HTR5A	9606.ENSP00000357461	9606.ENSP00000287907	0	0	0	0	0.291	0	0	0.322	0.5
CLCF1	NAA16	9606.ENSP00000309338	9606.ENSP00000368716	0	0	0	0	0	0	0	0.613	0.613
CLNK	GCSAM	9606.ENSP00000226951	9606.ENSP00000419485	0	0	0	0	0	0	0	0.49	0.49
CNR1	GNG13	9606.ENSP00000358513	9606.ENSP00000248150	0	0	0	0	0.101	0	0.6	0	0.625
CNR1	SNAP25	9606.ENSP00000358513	9606.ENSP00000254976	0	0	0	0	0.23	0	0	0.261	0.406
CNR1	NTRK2	9606.ENSP00000358513	9606.ENSP00000277120	0	0	0	0	0.232	0.056	0	0.767	0.816
CNR1	CREB1	9606.ENSP00000358513	9606.ENSP00000387699	0	0	0	0	0	0.058	0	0.468	0.477
CNR1	PPARA	9606.ENSP00000358513	9606.ENSP00000385523	0	0	0	0	0	0.056	0	0.818	0.821
COL4A5	EXOC2	9606.ENSP00000331902	9606.ENSP00000230449	0	0	0	0	0	0	0	0.442	0.442
COL4A5	ITGAV	9606.ENSP00000331902	9606.ENSP00000261023	0	0	0	0	0.121	0	0.9	0.293	0.932
COL4A5	COL8A1	9606.ENSP00000331902	9606.ENSP00000261037	0	0	0.316	0.733	0.063	0	0.54	0.531	0.641
COL4A5	ITGA9	9606.ENSP00000331902	9606.ENSP00000264741	0	0	0	0	0.064	0	0.6	0.267	0.701
COL4A5	DOCK3	9606.ENSP00000331902	9606.ENSP00000266037	0	0	0	0	0.062	0	0	0.441	0.453
COL4A5	NCAM1	9606.ENSP00000331902	9606.ENSP00000480132	0	0	0	0	0	0.056	0.6	0.041	0.606
COL4A5	ITGA8	9606.ENSP00000331902	9606.ENSP00000367316	0	0	0	0	0.084	0	0.6	0.377	0.751
COL8A1	NIT2	9606.ENSP00000261037	9606.ENSP00000377696	0	0	0	0	0.049	0	0	0.664	0.667
CR2	CXCL13	9606.ENSP00000356024	9606.ENSP00000286758	0	0	0	0	0.075	0	0	0.634	0.647
CR2	CXCR5	9606.ENSP00000356024	9606.ENSP00000292174	0	0	0	0	0.062	0	0	0.694	0.701
CR2	NCAM1	9606.ENSP00000356024	9606.ENSP00000480132	0	0	0	0	0	0	0	0.561	0.561
CRB1	CTNNB1	9606.ENSP00000356370	9606.ENSP00000344456	0	0	0	0	0.054	0.213	0	0.387	0.504
CRB1	MFRP	9606.ENSP00000356370	9606.ENSP00000391664	0	0	0	0	0.062	0.074	0	0.553	0.578
CREB1	EGR2	9606.ENSP00000387699	9606.ENSP00000242480	0	0	0	0	0	0.062	0.65	0.471	0.811
CREB1	SRF	9606.ENSP00000387699	9606.ENSP00000265354	0	0	0	0	0	0.213	0.6	0.604	0.864
CREB1	IGF1R	9606.ENSP00000387699	9606.ENSP00000268035	0	0	0	0	0.06	0	0	0.471	0.481
CREB1	NCOR1	9606.ENSP00000387699	9606.ENSP00000268712	0	0	0	0	0.085	0.345	0	0.893	0.93
CREB1	NTRK2	9606.ENSP00000387699	9606.ENSP00000277120	0	0	0	0	0	0	0	0.765	0.765
CREB1	REL	9606.ENSP00000387699	9606.ENSP00000295025	0	0	0	0	0.062	0	0	0.935	0.936
CREB1	MESP1	9606.ENSP00000387699	9606.ENSP00000300057	0	0	0	0	0	0	0	0.676	0.676
CREB1	RNMTL1	9606.ENSP00000387699	9606.ENSP00000306080	0	0	0	0	0.083	0	0	0.447	0.471
CREB1	GSK3B	9606.ENSP00000387699	9606.ENSP00000324806	0	0	0	0	0.061	0.463	0.8	0.66	0.961
CREB1	HOMER1	9606.ENSP00000387699	9606.ENSP00000334382	0	0	0	0	0.062	0	0	0.506	0.516
CREB1	CTNNB1	9606.ENSP00000387699	9606.ENSP00000344456	0	0	0	0	0.062	0.675	0	0.756	0.919
CREB1	DISC1	9606.ENSP00000387699	9606.ENSP00000355593	0	0	0	0	0	0	0	0.405	0.405
CREB1	POU2F1	9606.ENSP00000387699	9606.ENSP00000356840	0	0	0	0	0.102	0.282	0	0.467	0.626
CREB1	CRTC2	9606.ENSP00000387699	9606.ENSP00000357622	0	0	0	0	0	0.868	0.8	0.989	0.999
CREB1	RUNX2	9606.ENSP00000387699	9606.ENSP00000360493	0	0	0	0	0	0	0	0.572	0.572
CREB1	PPARA	9606.ENSP00000387699	9606.ENSP00000385523	0	0	0	0	0	0.078	0	0.659	0.672
CREB1	TNRC6B	9606.ENSP00000387699	9606.ENSP00000401946	0	0	0	0	0	0	0.9	0.074	0.903
CREB1	SOS1	9606.ENSP00000387699	9606.ENSP00000387784	0	0	0	0	0.063	0	0.9	0.229	0.921
CRMP1	SNAP25	9606.ENSP00000321606	9606.ENSP00000254976	0	0	0	0	0.23	0	0	0.259	0.405
CRMP1	GSK3B	9606.ENSP00000321606	9606.ENSP00000324806	0	0	0	0	0.062	0.102	0.9	0.19	0.922
CTNNB1	SFRP1	9606.ENSP00000344456	9606.ENSP00000220772	0	0	0	0	0	0.089	0	0.774	0.785
CTNNB1	SIX3	9606.ENSP00000344456	9606.ENSP00000260653	0	0	0	0	0	0	0	0.46	0.46
CTNNB1	ITGAV	9606.ENSP00000344456	9606.ENSP00000261023	0	0	0	0	0.069	0.119	0	0.387	0.453
CTNNB1	TCF3	9606.ENSP00000344456	9606.ENSP00000262965	0	0	0	0	0.062	0.353	0.8	0.858	0.98
CTNNB1	SRF	9606.ENSP00000344456	9606.ENSP00000265354	0	0	0	0	0	0	0	0.428	0.428
CTNNB1	IGF1R	9606.ENSP00000344456	9606.ENSP00000268035	0	0	0	0	0.062	0.386	0.9	0.842	0.989
CTNNB1	NCOR1	9606.ENSP00000344456	9606.ENSP00000268712	0	0	0	0	0.045	0	0	0.516	0.518
CTNNB1	NTRK2	9606.ENSP00000344456	9606.ENSP00000277120	0	0	0	0	0	0.142	0.9	0.484	0.951
CTNNB1	SMAD6	9606.ENSP00000344456	9606.ENSP00000288840	0	0	0	0	0.062	0.141	0	0.465	0.532
CTNNB1	REL	9606.ENSP00000344456	9606.ENSP00000295025	0	0	0	0	0.046	0	0	0.401	0.404
CTNNB1	KLK3	9606.ENSP00000344456	9606.ENSP00000314151	0	0	0	0	0	0	0	0.458	0.457
CTNNB1	ROCK2	9606.ENSP00000344456	9606.ENSP00000317985	0	0	0	0	0.064	0.142	0.8	0.525	0.913
CTNNB1	GSK3B	9606.ENSP00000344456	9606.ENSP00000324806	0	0	0	0	0	0.968	0.9	0.993	0.999
CTNNB1	PPP2R2A	9606.ENSP00000344456	9606.ENSP00000325074	0	0	0	0	0.062	0.246	0	0.599	0.691
CTNNB1	PTN	9606.ENSP00000344456	9606.ENSP00000341170	0	0	0	0	0	0.27	0	0.37	0.52
CTNNB1	ELN	9606.ENSP00000344456	9606.ENSP00000351807	0	0	0	0	0	0	0	0.43	0.43
CTNNB1	DISC1	9606.ENSP00000344456	9606.ENSP00000355593	0	0	0	0	0	0	0	0.446	0.446
CTNNB1	KL	9606.ENSP00000344456	9606.ENSP00000369442	0	0	0	0	0	0	0	0.476	0.476
CTNNB1	UBD	9606.ENSP00000344456	9606.ENSP00000366249	0	0	0	0	0	0.15	0	0.413	0.48
CTNNB1	PPARA	9606.ENSP00000344456	9606.ENSP00000385523	0	0	0	0	0	0.056	0	0.507	0.514
CTNNB1	NCAM1	9606.ENSP00000344456	9606.ENSP00000480132	0	0	0	0	0	0.117	0	0.472	0.514
CTNNB1	TEAD1	9606.ENSP00000344456	9606.ENSP00000435233	0	0	0	0	0.065	0	0	0.536	0.548
CTNNB1	SMAD9	9606.ENSP00000344456	9606.ENSP00000369154	0	0	0	0	0.064	0.149	0	0.514	0.579
CTNNB1	UBA52	9606.ENSP00000344456	9606.ENSP00000388107	0	0	0	0	0.062	0	0.6	0.053	0.613
CTNNB1	XIAP	9606.ENSP00000344456	9606.ENSP00000360242	0	0	0	0	0.062	0	0	0.624	0.633
CTNNB1	FAF1	9606.ENSP00000344456	9606.ENSP00000379457	0	0	0	0	0.062	0.675	0	0.509	0.837
CTNNB1	MAP2K6	9606.ENSP00000344456	9606.ENSP00000468348	0	0	0	0	0.084	0	0.9	0.171	0.917
CTNNB1	LDB1	9606.ENSP00000344456	9606.ENSP00000392466	0	0	0	0	0.062	0.145	0.9	0.14	0.921
CTNNB1	ROBO1	9606.ENSP00000344456	9606.ENSP00000420321	0	0	0	0	0.06	0	0.9	0.404	0.939
CTNNB1	RUNX2	9606.ENSP00000344456	9606.ENSP00000360493	0	0	0	0	0	0.107	0	0.937	0.942
CTNNB1	SOX6	9606.ENSP00000344456	9606.ENSP00000379644	0	0	0	0	0.062	0.281	0.6	0.978	0.993
CTTNBP2NL	MAP2K6	9606.ENSP00000271277	9606.ENSP00000468348	0	0	0	0	0	0	0	0.456	0.456
CTTNBP2NL	SIKE1	9606.ENSP00000271277	9606.ENSP00000358541	0	0	0	0	0	0	0	0.657	0.657
CXCL13	CXCR5	9606.ENSP00000286758	9606.ENSP00000292174	0	0	0	0	0.094	0.463	0.8	0.989	0.998
CYP2C8	UGT2A3	9606.ENSP00000360317	9606.ENSP00000251566	0	0	0	0	0.065	0.058	0.65	0.314	0.76
CYP2C8	SLCO1B3	9606.ENSP00000360317	9606.ENSP00000261196	0	0	0	0	0.066	0	0	0.637	0.646
CYP2C8	SLCO1A2	9606.ENSP00000360317	9606.ENSP00000305974	0	0	0	0	0	0	0	0.452	0.452
CYP2C8	PPARA	9606.ENSP00000360317	9606.ENSP00000385523	0	0	0	0	0.048	0.073	0	0.392	0.416
CYP2C8	GPX3	9606.ENSP00000360317	9606.ENSP00000373477	0	0	0	0	0.049	0	0.65	0.053	0.657
CYP7B1	STS	9606.ENSP00000310721	9606.ENSP00000217961	0	0	0	0	0.062	0	0.9	0.077	0.905
CYP7B1	SLCO1A2	9606.ENSP00000310721	9606.ENSP00000305974	0	0	0	0	0.108	0	0	0.407	0.448
CYP7B1	PPARA	9606.ENSP00000310721	9606.ENSP00000385523	0	0	0	0	0.063	0.073	0	0.401	0.434
CYSLTR2	GNG13	9606.ENSP00000282018	9606.ENSP00000248150	0	0	0	0	0	0	0.6	0	0.6
DCTN1	IGF1R	9606.ENSP00000354791	9606.ENSP00000268035	0	0	0	0	0	0.06	0	0.425	0.437
DCTN1	DYNAP	9606.ENSP00000354791	9606.ENSP00000315265	0	0	0	0	0	0	0	0.421	0.42
DCTN1	SPAG16	9606.ENSP00000354791	9606.ENSP00000332592	0	0	0	0	0	0.74	0	0.303	0.811
DCTN1	UBQLN2	9606.ENSP00000354791	9606.ENSP00000345195	0	0	0	0	0.042	0.173	0	0.63	0.681
DCTN1	DISC1	9606.ENSP00000354791	9606.ENSP00000355593	0	0	0	0	0	0.272	0	0.317	0.482
DCTN1	PDGFD	9606.ENSP00000354791	9606.ENSP00000376865	0	0	0	0	0	0.608	0	0	0.608
DCTN1	OPTN	9606.ENSP00000354791	9606.ENSP00000368022	0	0	0	0	0	0	0	0.611	0.611
DCTN1	DNAL1	9606.ENSP00000354791	9606.ENSP00000452037	0	0	0	0	0.049	0	0.8	0	0.801
DCTN1	PAFAH1B1	9606.ENSP00000354791	9606.ENSP00000380378	0	0	0	0	0.06	0.984	0.9	0.876	0.999
DHX40	EIF4A3	9606.ENSP00000251241	9606.ENSP00000269349	0	0	0	0	0.184	0.259	0	0.274	0.522
DIS3	EIF4A3	9606.ENSP00000366997	9606.ENSP00000269349	0.048	0	0	0	0.135	0.176	0	0.263	0.433
DIS3	ZC3H12B	9606.ENSP00000366997	9606.ENSP00000340839	0	0	0	0	0.066	0	0	0.436	0.451
DIS3	LIN28B	9606.ENSP00000366997	9606.ENSP00000344401	0	0	0	0	0.062	0.15	0	0.497	0.564
DIS3	ROBO1	9606.ENSP00000366997	9606.ENSP00000420321	0	0	0	0	0	0	0	0.602	0.602
DISC1	KALRN	9606.ENSP00000355593	9606.ENSP00000240874	0	0	0	0	0	0.284	0	0.989	0.992
DISC1	NCOR1	9606.ENSP00000355593	9606.ENSP00000268712	0	0	0	0	0	0	0	0.698	0.698
DISC1	MCM9	9606.ENSP00000355593	9606.ENSP00000314505	0	0	0	0	0	0	0	0.403	0.403
DISC1	GSK3B	9606.ENSP00000355593	9606.ENSP00000324806	0	0	0	0	0	0.345	0	0.922	0.947
DISC1	SRGAP2	9606.ENSP00000355593	9606.ENSP00000459615	0	0	0	0	0	0.272	0	0.266	0.443
DISC1	NRG1	9606.ENSP00000355593	9606.ENSP00000384620	0	0	0	0	0	0	0	0.807	0.807
DISC1	PAFAH1B1	9606.ENSP00000355593	9606.ENSP00000380378	0	0	0	0	0	0.492	0	0.987	0.993
DNAJC24	KPNA4	9606.ENSP00000417548	9606.ENSP00000334373	0	0	0	0	0.062	0.076	0	0.582	0.606
DNAL1	SPAG16	9606.ENSP00000452037	9606.ENSP00000332592	0	0	0	0	0.053	0	0	0.433	0.44
DNAL1	UBE2L3	9606.ENSP00000452037	9606.ENSP00000400906	0	0	0	0	0.062	0.059	0	0.436	0.459
DNM3	RBM28	9606.ENSP00000356705	9606.ENSP00000223073	0	0	0	0	0	0.369	0	0.255	0.509
DNM3	SNAP25	9606.ENSP00000356705	9606.ENSP00000254976	0	0	0	0	0.317	0.102	0	0.129	0.419
DNM3	HOMER1	9606.ENSP00000356705	9606.ENSP00000334382	0	0	0	0	0	0.225	0	0.735	0.786
DOCK3	EXOC2	9606.ENSP00000266037	9606.ENSP00000230449	0	0	0	0	0.062	0	0	0.466	0.478
DOCK3	KALRN	9606.ENSP00000266037	9606.ENSP00000240874	0	0	0	0	0.086	0.057	0	0.36	0.401
DOCK3	SOS1	9606.ENSP00000266037	9606.ENSP00000387784	0	0	0	0	0.086	0.245	0	0.321	0.49
DOCK3	NTRK2	9606.ENSP00000266037	9606.ENSP00000277120	0	0	0	0	0.147	0.057	0.6	0.221	0.716
DPP10	KCNC3	9606.ENSP00000376855	9606.ENSP00000434241	0	0	0	0	0.087	0.061	0	0.356	0.4
DPPA3	TET1	9606.ENSP00000339250	9606.ENSP00000362748	0	0	0	0	0	0	0	0.46	0.459
DPPA3	LIN28B	9606.ENSP00000339250	9606.ENSP00000344401	0	0	0	0	0	0	0	0.659	0.659
DUSP11	POLR1A	9606.ENSP00000272444	9606.ENSP00000263857	0	0	0	0	0.065	0.336	0	0.137	0.417
EGR2	HOMER1	9606.ENSP00000242480	9606.ENSP00000334382	0	0	0	0	0.062	0	0	0.394	0.407
EGR2	NRG1	9606.ENSP00000242480	9606.ENSP00000384620	0	0	0	0	0	0	0	0.52	0.52
EGR2	SH3TC2	9606.ENSP00000242480	9606.ENSP00000423660	0	0	0	0	0	0	0	0.609	0.609
EGR2	HOXB9	9606.ENSP00000242480	9606.ENSP00000309439	0	0	0	0	0.062	0.059	0	0.662	0.676
EGR2	TEAD1	9606.ENSP00000242480	9606.ENSP00000435233	0	0	0	0	0	0.057	0.6	0.221	0.68
EGR2	SRF	9606.ENSP00000242480	9606.ENSP00000265354	0	0	0	0	0.062	0.066	0.9	0.366	0.937
EIF4A3	RBM28	9606.ENSP00000269349	9606.ENSP00000223073	0	0	0	0	0.755	0.182	0	0.082	0.799
EIF4A3	SELK	9606.ENSP00000269349	9606.ENSP00000418813	0	0	0	0	0.063	0	0	0.391	0.405
EIF4A3	LIN28B	9606.ENSP00000269349	9606.ENSP00000344401	0.046	0	0	0	0	0.318	0	0.177	0.418
EIF4A3	HNRNPAB	9606.ENSP00000269349	9606.ENSP00000351108	0	0	0	0	0.376	0.166	0	0.059	0.468
EIF4A3	SNRNP70	9606.ENSP00000269349	9606.ENSP00000472998	0.042	0	0	0	0.338	0.322	0	0.167	0.595
EIF4A3	LUZP4	9606.ENSP00000269349	9606.ENSP00000360988	0	0	0	0	0	0.27	0.6	0.045	0.696
EIF4A3	SMG7	9606.ENSP00000269349	9606.ENSP00000425133	0	0	0	0	0.047	0.064	0	0.707	0.715
EIF4A3	EIF4G1	9606.ENSP00000269349	9606.ENSP00000416255	0	0	0	0	0.138	0.378	0.6	0.958	0.989
EIF4G1	POLR1A	9606.ENSP00000416255	9606.ENSP00000263857	0	0	0	0	0.651	0.067	0	0.294	0.75
EIF4G1	PPP2R2A	9606.ENSP00000416255	9606.ENSP00000325074	0	0	0	0	0.069	0	0.6	0	0.612
EIF4G1	LARP1	9606.ENSP00000416255	9606.ENSP00000336721	0	0	0	0	0.27	0.389	0	0.665	0.837
EIF4G1	HNRNPAB	9606.ENSP00000416255	9606.ENSP00000351108	0	0	0	0	0.321	0.142	0	0.085	0.421
EIF4G1	RPS29	9606.ENSP00000416255	9606.ENSP00000379339	0	0	0	0	0.308	0.8	0	0.055	0.857
EIF4G1	UBA52	9606.ENSP00000416255	9606.ENSP00000388107	0	0	0	0	0.065	0	0.6	0.102	0.634
EIF4G1	SNRNP70	9606.ENSP00000416255	9606.ENSP00000472998	0	0	0	0	0.136	0.285	0	0.12	0.409
EIF4G1	SMG7	9606.ENSP00000416255	9606.ENSP00000425133	0	0	0	0	0.099	0	0.8	0.293	0.861
ELN	LTBP2	9606.ENSP00000351807	9606.ENSP00000261978	0	0	0	0	0.084	0	0	0.679	0.694
ELN	RUNX2	9606.ENSP00000351807	9606.ENSP00000360493	0	0	0	0	0	0	0	0.455	0.455
ELN	TNMD	9606.ENSP00000351807	9606.ENSP00000362122	0	0	0	0	0.062	0	0	0.476	0.487
EMB	SLC16A10	9606.ENSP00000302289	9606.ENSP00000357844	0	0	0	0	0	0	0	0.586	0.586
EMB	RBM33	9606.ENSP00000302289	9606.ENSP00000384160	0	0	0	0	0	0	0	0.629	0.629
ENPP5	TAF9	9606.ENSP00000360436	9606.ENSP00000370201	0	0	0	0	0.062	0	0	0.419	0.431
EPHA3	ROBO1	9606.ENSP00000337451	9606.ENSP00000420321	0	0	0	0	0.096	0.119	0	0.408	0.487
EPHA3	NCAM1	9606.ENSP00000337451	9606.ENSP00000480132	0	0	0	0	0.073	0.104	0	0.755	0.779
ERG	KLK3	9606.ENSP00000414150	9606.ENSP00000314151	0	0	0	0	0	0.28	0	0.383	0.536
ERG	RUNX2	9606.ENSP00000414150	9606.ENSP00000360493	0	0	0	0	0	0.83	0	0.145	0.848
ESYT3	JPH3	9606.ENSP00000374218	9606.ENSP00000284262	0	0	0	0	0	0	0	0.487	0.487
ESYT3	JPH1	9606.ENSP00000374218	9606.ENSP00000344488	0	0	0	0	0.06	0	0	0.534	0.543
EXOC2	XPOT	9606.ENSP00000230449	9606.ENSP00000327821	0	0	0	0	0.062	0	0	0.434	0.447
EXOC2	RALGAPB	9606.ENSP00000230449	9606.ENSP00000262879	0	0	0	0	0.132	0	0	0.556	0.599
EXOC2	SNAP25	9606.ENSP00000230449	9606.ENSP00000254976	0	0	0	0	0	0.189	0	0.577	0.642
F9	IDS	9606.ENSP00000218099	9606.ENSP00000339801	0	0	0	0	0	0	0	0.536	0.536
FAF1	SREK1	9606.ENSP00000379457	9606.ENSP00000334538	0	0	0	0	0	0	0	0.4	0.4
FAM107B	MBNL2	9606.ENSP00000181796	9606.ENSP00000267287	0	0	0	0	0	0	0	0.404	0.404
FAM72A	SRGAP2	9606.ENSP00000356096	9606.ENSP00000459615	0	0	0	0	0	0	0	0.402	0.402
FAM72B	ZNF738	9606.ENSP00000358397	9606.ENSP00000311957	0	0	0	0	0	0	0	0.468	0.468
FAM96B	ZFYVE21	9606.ENSP00000387471	9606.ENSP00000216602	0	0	0	0	0	0	0	0.552	0.552
FAM96B	MRPL55	9606.ENSP00000387471	9606.ENSP00000403614	0	0	0	0	0.53	0	0	0	0.53
FBXL20	SCARB1	9606.ENSP00000264658	9606.ENSP00000261693	0	0	0	0	0.062	0	0	0.413	0.425
FBXL20	SMG7	9606.ENSP00000264658	9606.ENSP00000425133	0	0	0	0	0.062	0	0	0.408	0.421
FCRL1	PIGR	9606.ENSP00000357158	9606.ENSP00000348888	0	0	0	0	0	0	0	0.764	0.764
FGFR1OP	ROBO1	9606.ENSP00000355812	9606.ENSP00000420321	0	0	0	0	0	0	0	0.426	0.426
FGFR1OP	FOXP1	9606.ENSP00000355812	9606.ENSP00000484803	0	0	0	0	0.061	0	0	0.537	0.546
FLRT2	GPR158	9606.ENSP00000332879	9606.ENSP00000365529	0	0	0	0	0.062	0	0	0.402	0.415
FLRT2	KL	9606.ENSP00000332879	9606.ENSP00000369442	0	0	0	0	0	0	0.6	0.049	0.603
FMO2	UGT2A3	9606.ENSP00000209929	9606.ENSP00000251566	0	0	0	0	0.082	0	0	0.453	0.476
FOXI2	RNF24	9606.ENSP00000373572	9606.ENSP00000388550	0	0	0	0	0	0.057	0	0.452	0.461
FOXK2	SRF	9606.ENSP00000335677	9606.ENSP00000265354	0	0	0	0	0.065	0.371	0	0.699	0.807
FOXK2	NCOR1	9606.ENSP00000335677	9606.ENSP00000268712	0	0	0	0	0.079	0.467	0	0.682	0.83
FOXK2	TET1	9606.ENSP00000335677	9606.ENSP00000362748	0	0	0	0	0	0.061	0	0.442	0.454
FOXK2	UBA52	9606.ENSP00000335677	9606.ENSP00000388107	0	0	0	0	0	0.067	0.9	0	0.902
GABBR2	GNG13	9606.ENSP00000259455	9606.ENSP00000248150	0	0	0	0	0.135	0	0.6	0.054	0.644
GABBR2	RAMP2	9606.ENSP00000259455	9606.ENSP00000253796	0	0	0	0	0	0	0.72	0.206	0.768
GABBR2	NTRK2	9606.ENSP00000259455	9606.ENSP00000277120	0	0	0	0	0.159	0	0	0.359	0.438
GABBR2	HTR5A	9606.ENSP00000259455	9606.ENSP00000287907	0	0	0	0	0.351	0	0	0.26	0.499
GJA3	GJC1	9606.ENSP00000241125	9606.ENSP00000411528	0	0	0	0.86	0.062	0	0.54	0.902	0.606
GLOD4	NAA38	9606.ENSP00000301329	9606.ENSP00000332103	0	0	0	0	0.062	0	0	0.39	0.403
GNG13	OR7D2	9606.ENSP00000248150	9606.ENSP00000345563	0	0	0	0	0	0	0.6	0.121	0.633
GNG13	HTR5A	9606.ENSP00000248150	9606.ENSP00000287907	0	0	0	0	0.352	0	0.6	0	0.729
GPATCH2	UACA	9606.ENSP00000355902	9606.ENSP00000314556	0	0	0	0	0	0.057	0	0.406	0.416
GPX3	SELK	9606.ENSP00000373477	9606.ENSP00000418813	0	0	0	0	0	0	0	0.75	0.75
GSK3B	SFRP1	9606.ENSP00000324806	9606.ENSP00000220772	0	0	0	0	0	0.069	0	0.485	0.5
GSK3B	POLR1A	9606.ENSP00000324806	9606.ENSP00000263857	0	0	0	0	0.062	0	0.9	0.049	0.903
GSK3B	IGF1R	9606.ENSP00000324806	9606.ENSP00000268035	0	0	0	0	0.062	0.056	0	0.513	0.531
GSK3B	NTRK2	9606.ENSP00000324806	9606.ENSP00000277120	0	0	0	0	0.062	0.102	0	0.435	0.483
GSK3B	PPARA	9606.ENSP00000324806	9606.ENSP00000385523	0	0	0	0	0	0.077	0	0.41	0.432
GSK3B	RCAN2	9606.ENSP00000324806	9606.ENSP00000360425	0	0	0	0	0	0.478	0	0.14	0.532
GSK3B	UBA52	9606.ENSP00000324806	9606.ENSP00000388107	0	0	0	0	0	0	0.6	0	0.6
GSK3B	XIAP	9606.ENSP00000324806	9606.ENSP00000360242	0	0	0	0	0.062	0.526	0	0.359	0.69
GSK3B	RUNX2	9606.ENSP00000324806	9606.ENSP00000360493	0	0	0	0	0	0	0.6	0.442	0.767
H3F3B	KDM4C	9606.ENSP00000254810	9606.ENSP00000370710	0	0	0	0	0	0.347	0	0.192	0.45
H3F3B	HDAC9	9606.ENSP00000254810	9606.ENSP00000408617	0.044	0	0	0	0	0.363	0	0.213	0.479
H3F3B	SETD7	9606.ENSP00000254810	9606.ENSP00000274031	0	0	0	0	0.049	0.369	0	0.258	0.516
H3F3B	ZZZ3	9606.ENSP00000254810	9606.ENSP00000359837	0	0	0	0	0	0.8	0	0	0.8
HDAC9	SRF	9606.ENSP00000408617	9606.ENSP00000265354	0	0	0	0	0.062	0.14	0	0.34	0.421
HDAC9	NCOR1	9606.ENSP00000408617	9606.ENSP00000268712	0	0	0	0	0.065	0.579	0.6	0.927	0.987
HDAC9	SETD7	9606.ENSP00000408617	9606.ENSP00000274031	0.044	0	0	0	0.062	0.17	0	0.388	0.484
HDAC9	RUNX2	9606.ENSP00000408617	9606.ENSP00000360493	0	0	0	0	0	0.103	0	0.961	0.964
HECW2	NTRK2	9606.ENSP00000260983	9606.ENSP00000277120	0	0	0	0	0.086	0.078	0	0.367	0.42
HECW2	UBE2L3	9606.ENSP00000260983	9606.ENSP00000400906	0	0	0	0	0.062	0.549	0	0.208	0.636
HELLS	KIF20B	9606.ENSP00000377601	9606.ENSP00000360793	0	0	0	0	0.433	0.14	0	0	0.491
HNMT	SETD7	9606.ENSP00000280097	9606.ENSP00000274031	0	0	0	0	0	0	0	0.601	0.601
HNRNPAB	SNRNP70	9606.ENSP00000351108	9606.ENSP00000472998	0	0	0	0	0.302	0.324	0	0.107	0.542
HOMER1	TAOK1	9606.ENSP00000334382	9606.ENSP00000261716	0	0	0	0	0	0	0	0.483	0.483
HOMER1	NTRK2	9606.ENSP00000334382	9606.ENSP00000277120	0	0	0	0	0	0	0	0.481	0.481
HOMER1	HOMER2	9606.ENSP00000334382	9606.ENSP00000305632	0	0	0	0.94	0	0.88	0.8	0.915	0.976
HOMER1	JMY	9606.ENSP00000334382	9606.ENSP00000379441	0	0	0	0	0	0	0	0.529	0.529
HOXB9	SIX3	9606.ENSP00000309439	9606.ENSP00000260653	0	0	0	0	0	0	0	0.417	0.417
HS2ST1	HS3ST3A1	9606.ENSP00000359581	9606.ENSP00000284110	0	0	0	0	0	0.076	0	0.712	0.722
HS3ST3A1	XKR4	9606.ENSP00000284110	9606.ENSP00000328326	0	0	0	0	0	0	0	0.532	0.532
HTATIP2	POLR3D	9606.ENSP00000392985	9606.ENSP00000380904	0	0	0	0	0	0	0	0.434	0.434
HTATIP2	SH3GLB1	9606.ENSP00000392985	9606.ENSP00000479919	0	0	0	0	0	0.298	0	0.69	0.773
HTR5A	SNAP25	9606.ENSP00000287907	9606.ENSP00000254976	0	0	0	0	0.491	0	0	0.081	0.512
HTR5A	SPX	9606.ENSP00000287907	9606.ENSP00000256969	0	0	0	0	0.535	0	0	0	0.535
HTR5A	NTRK2	9606.ENSP00000287907	9606.ENSP00000277120	0	0	0	0	0.351	0.056	0	0.156	0.438
HTR5A	KCNS1	9606.ENSP00000287907	9606.ENSP00000307694	0	0	0	0	0.335	0	0	0.209	0.451
HTR5A	OLFM3	9606.ENSP00000287907	9606.ENSP00000345192	0	0	0	0	0.503	0	0	0	0.503
IFNAR1	SIKE1	9606.ENSP00000270139	9606.ENSP00000358541	0	0	0	0	0	0	0	0.667	0.667
IFNAR1	SOCS3	9606.ENSP00000270139	9606.ENSP00000330341	0	0	0	0	0.063	0	0.6	0.642	0.854
IGF1R	ITGAV	9606.ENSP00000268035	9606.ENSP00000261023	0	0	0	0	0	0.075	0.9	0.364	0.936
IGF1R	KLK3	9606.ENSP00000268035	9606.ENSP00000314151	0	0	0	0	0	0.056	0	0.419	0.428
IGF1R	XIAP	9606.ENSP00000268035	9606.ENSP00000360242	0	0	0	0	0.062	0.116	0	0.409	0.467
IGF1R	IGFBP4	9606.ENSP00000268035	9606.ENSP00000269593	0	0	0	0	0	0	0	0.637	0.637
IGF1R	NEDD4L	9606.ENSP00000268035	9606.ENSP00000383199	0	0	0	0	0.049	0.078	0.6	0.168	0.669
IGF1R	IGFBP6	9606.ENSP00000268035	9606.ENSP00000301464	0	0	0	0	0	0	0	0.676	0.677
IGF1R	PDGFD	9606.ENSP00000268035	9606.ENSP00000376865	0	0	0	0	0	0	0.6	0.234	0.68
IGF1R	SOCS3	9606.ENSP00000268035	9606.ENSP00000330341	0	0	0	0	0	0.317	0	0.691	0.78
IGF1R	KL	9606.ENSP00000268035	9606.ENSP00000369442	0	0	0	0	0	0.226	0.8	0.456	0.908
IGF1R	SOS1	9606.ENSP00000268035	9606.ENSP00000387784	0	0	0	0	0.062	0.1	0.9	0.277	0.93
IGFBP4	STC2	9606.ENSP00000269593	9606.ENSP00000265087	0	0	0	0	0.11	0	0	0.502	0.537
ISX	SCARB1	9606.ENSP00000311492	9606.ENSP00000261693	0	0	0	0	0.062	0	0	0.763	0.768
ITGA8	TNN	9606.ENSP00000367316	9606.ENSP00000239462	0	0	0	0	0.062	0.151	0.8	0.088	0.835
ITGA8	ITGAV	9606.ENSP00000367316	9606.ENSP00000261023	0	0	0	0.936	0.062	0	0.9	0.54	0.905
ITGA8	ITGA9	9606.ENSP00000367316	9606.ENSP00000264741	0	0	0	0.672	0.082	0	0.72	0.567	0.78
ITGA9	TNN	9606.ENSP00000264741	9606.ENSP00000239462	0	0	0	0	0.075	0.151	0.8	0.15	0.848
ITGA9	ITGAV	9606.ENSP00000264741	9606.ENSP00000261023	0	0	0	0.651	0	0	0.72	0.553	0.772
ITGAV	TNN	9606.ENSP00000261023	9606.ENSP00000239462	0	0	0	0	0.062	0.151	0.8	0.088	0.835
ITGAV	ZC3H15	9606.ENSP00000261023	9606.ENSP00000338788	0	0	0	0	0.065	0	0	0.455	0.469
ITGAV	SH3D19	9606.ENSP00000261023	9606.ENSP00000302913	0	0	0	0	0.108	0	0	0.456	0.495
ITGAV	PIK3C2A	9606.ENSP00000261023	9606.ENSP00000265970	0	0	0	0	0.095	0	0.9	0.054	0.907
JMY	UBA52	9606.ENSP00000379441	9606.ENSP00000388107	0	0	0	0	0	0	0.9	0	0.9
JPH1	SLC2A9	9606.ENSP00000344488	9606.ENSP00000264784	0	0	0	0	0	0	0	0.463	0.463
JPH1	JPH3	9606.ENSP00000344488	9606.ENSP00000284262	0	0	0	0.94	0.088	0	0.54	0.811	0.583
JPH3	PANK2	9606.ENSP00000284262	9606.ENSP00000313377	0	0	0	0	0.054	0	0	0.503	0.51
JTB	WDFY3	9606.ENSP00000271843	9606.ENSP00000295888	0	0	0	0	0	0	0	0.417	0.417
JTB	NAPG	9606.ENSP00000271843	9606.ENSP00000324628	0	0	0	0	0	0	0	0.428	0.428
KALRN	NTRK2	9606.ENSP00000240874	9606.ENSP00000277120	0	0	0	0	0.152	0.101	0	0.288	0.41
KCNC3	KCNS1	9606.ENSP00000434241	9606.ENSP00000307694	0	0	0	0.777	0.098	0.226	0.5	0.515	0.662
KCNC3	UBA52	9606.ENSP00000434241	9606.ENSP00000388107	0	0	0	0	0.234	0.262	0	0.062	0.423
KCNS1	UBA52	9606.ENSP00000307694	9606.ENSP00000388107	0	0	0	0	0.234	0.262	0	0.062	0.423
KDM4C	SETD7	9606.ENSP00000370710	9606.ENSP00000274031	0	0	0	0	0.062	0.071	0	0.466	0.494
KDM4C	TET1	9606.ENSP00000370710	9606.ENSP00000362748	0	0	0	0	0.062	0	0	0.401	0.414
KL	UGT2A3	9606.ENSP00000369442	9606.ENSP00000251566	0	0	0	0	0	0	0.65	0.101	0.671
KL	RUNX2	9606.ENSP00000369442	9606.ENSP00000360493	0	0	0	0	0	0	0	0.522	0.522
KL	SOS1	9606.ENSP00000369442	9606.ENSP00000387784	0	0	0	0	0	0	0.5	0.064	0.511
KL	UBA52	9606.ENSP00000369442	9606.ENSP00000388107	0	0	0	0	0.052	0	0.6	0.14	0.645
KLK3	UBA52	9606.ENSP00000314151	9606.ENSP00000388107	0	0	0	0	0	0.478	0	0	0.478
KPNA4	REL	9606.ENSP00000334373	9606.ENSP00000295025	0	0	0	0	0	0	0	0.404	0.404
LARP1	RPS29	9606.ENSP00000336721	9606.ENSP00000379339	0	0	0	0	0.203	0.293	0	0.042	0.413
LCOR	NCOR1	9606.ENSP00000360138	9606.ENSP00000268712	0	0	0	0	0	0	0	0.573	0.573
LDB1	RAB2A	9606.ENSP00000392466	9606.ENSP00000262646	0	0	0	0	0	0	0	0.682	0.682
LDB1	TCF3	9606.ENSP00000392466	9606.ENSP00000262965	0	0	0	0	0.092	0.297	0.6	0.958	0.988
LILRA2	RNASE2	9606.ENSP00000251377	9606.ENSP00000303276	0	0	0	0	0.154	0	0	0.52	0.576
LINGO1	SEMA3D	9606.ENSP00000347451	9606.ENSP00000284136	0	0	0	0	0	0	0	0.4	0.4
LINGO1	NCAM1	9606.ENSP00000347451	9606.ENSP00000480132	0	0	0	0	0.151	0.059	0	0.363	0.447
LTBP2	OPTN	9606.ENSP00000261978	9606.ENSP00000368022	0	0	0	0	0.062	0	0	0.394	0.407
MAP2K6	PEBP1	9606.ENSP00000468348	9606.ENSP00000261313	0	0	0	0	0	0	0.9	0	0.9
MAP2K6	TAOK1	9606.ENSP00000468348	9606.ENSP00000261716	0	0	0	0.7	0.062	0	0.9	0.567	0.918
MAP2K6	TAOK3	9606.ENSP00000468348	9606.ENSP00000376317	0	0	0	0.691	0.062	0	0.9	0.387	0.913
MED6	POLR1A	9606.ENSP00000481920	9606.ENSP00000263857	0	0	0	0	0	0.396	0	0.143	0.46
MESP1	TCF3	9606.ENSP00000300057	9606.ENSP00000262965	0	0	0	0	0.062	0.355	0	0.091	0.402
MGA	NCOR1	9606.ENSP00000219905	9606.ENSP00000268712	0	0	0	0	0	0.392	0	0.061	0.404
MGA	PHIP	9606.ENSP00000219905	9606.ENSP00000275034	0	0	0	0	0.645	0.063	0	0	0.653
MGA	TAF9	9606.ENSP00000219905	9606.ENSP00000370201	0	0	0	0	0	0	0.9	0.069	0.902
MON1B	VPS8	9606.ENSP00000248248	9606.ENSP00000404704	0	0	0	0	0.066	0.056	0	0.493	0.514
MRM1	RNMTL1	9606.ENSP00000481559	9606.ENSP00000306080	0	0	0	0	0.066	0.13	0	0.818	0.839
MRPL55	MRPS23	9606.ENSP00000403614	9606.ENSP00000320184	0	0	0	0	0.248	0.821	0	0	0.86
MYO9A	WDFY3	9606.ENSP00000348349	9606.ENSP00000295888	0	0	0	0	0.083	0.078	0	0.412	0.459
NAA16	NAA38	9606.ENSP00000368716	9606.ENSP00000332103	0	0	0	0	0	0	0.9	0.051	0.901
NAA38	SNRNP70	9606.ENSP00000332103	9606.ENSP00000472998	0	0	0	0	0.065	0.554	0	0.303	0.683
NAPG	SNAP25	9606.ENSP00000324628	9606.ENSP00000254976	0	0	0	0	0.062	0.228	0.54	0.133	0.672
NAPG	RGP1	9606.ENSP00000324628	9606.ENSP00000367318	0	0	0	0	0	0	0.65	0	0.65
NAPG	ZNF550	9606.ENSP00000324628	9606.ENSP00000446224	0	0	0	0	0	0	0	0.725	0.725
NCAM1	SNAP25	9606.ENSP00000480132	9606.ENSP00000254976	0	0	0	0	0.277	0.121	0	0.366	0.562
NCAM1	NTRK2	9606.ENSP00000480132	9606.ENSP00000277120	0	0	0	0.545	0.191	0.227	0	0.441	0.471
NCAM1	PIGR	9606.ENSP00000480132	9606.ENSP00000348888	0	0	0	0	0	0	0	0.55	0.55
NCAM1	SOS1	9606.ENSP00000480132	9606.ENSP00000387784	0	0	0	0	0	0	0.5	0	0.499
NCKAP1	WIPF2	9606.ENSP00000354251	9606.ENSP00000320924	0	0	0	0	0.062	0.156	0.6	0.302	0.749
NCOR1	PHIP	9606.ENSP00000268712	9606.ENSP00000275034	0	0	0	0	0.227	0.228	0	0.082	0.404
NCOR1	WDFY3	9606.ENSP00000268712	9606.ENSP00000295888	0	0	0	0	0.224	0	0	0.289	0.424
NCOR1	PRDM16	9606.ENSP00000268712	9606.ENSP00000270722	0	0	0	0	0	0.145	0	0.375	0.443
NCOR1	PAFAH1B1	9606.ENSP00000268712	9606.ENSP00000380378	0	0	0	0	0.076	0	0	0.43	0.451
NCOR1	UBA52	9606.ENSP00000268712	9606.ENSP00000388107	0	0	0	0	0.066	0	0.9	0	0.902
NCOR1	PPARA	9606.ENSP00000268712	9606.ENSP00000385523	0	0	0	0	0	0.895	0.9	0.986	0.999
NECAP1	PIK3C2A	9606.ENSP00000341737	9606.ENSP00000265970	0	0	0	0	0	0	0.6	0.107	0.627
NECAP1	UBQLN2	9606.ENSP00000341737	9606.ENSP00000345195	0	0	0	0	0.052	0	0.9	0	0.901
NEDD4L	SMAD6	9606.ENSP00000383199	9606.ENSP00000288840	0	0	0	0	0	0.384	0	0.324	0.566
NEDD4L	SLC22A11	9606.ENSP00000383199	9606.ENSP00000301891	0	0	0	0	0	0.495	0	0.171	0.564
NEDD4L	UBQLN2	9606.ENSP00000383199	9606.ENSP00000345195	0	0	0	0	0.059	0.167	0	0.347	0.444
NEDD4L	UBD	9606.ENSP00000383199	9606.ENSP00000366249	0	0	0	0	0.059	0.167	0	0.332	0.43
NEDD4L	UBA52	9606.ENSP00000383199	9606.ENSP00000388107	0	0	0	0	0	0.376	0.6	0.222	0.788
NEDD4L	UBE2L3	9606.ENSP00000383199	9606.ENSP00000400906	0	0	0	0	0.062	0.907	0	0.589	0.961
NRG1	NTRK2	9606.ENSP00000384620	9606.ENSP00000277120	0	0	0	0	0	0	0	0.403	0.403
NRG1	UBA52	9606.ENSP00000384620	9606.ENSP00000388107	0	0	0	0	0	0	0.6	0	0.6
NRG1	SOS1	9606.ENSP00000384620	9606.ENSP00000387784	0	0	0	0	0	0	0.9	0.047	0.9
NTRK2	SNAP25	9606.ENSP00000277120	9606.ENSP00000254976	0	0	0	0	0.352	0.057	0	0.401	0.602
NTRK2	PTN	9606.ENSP00000277120	9606.ENSP00000341170	0	0	0	0	0.263	0	0	0.244	0.419
NTRK2	PDGFD	9606.ENSP00000277120	9606.ENSP00000376865	0	0	0	0	0	0	0.6	0.043	0.6
NTRK2	XIAP	9606.ENSP00000277120	9606.ENSP00000360242	0	0	0	0	0	0.116	0	0.715	0.738
NTRK2	SOS1	9606.ENSP00000277120	9606.ENSP00000387784	0	0	0	0	0.062	0.1	0.9	0.106	0.914
OLFM3	SNAP25	9606.ENSP00000345192	9606.ENSP00000254976	0	0	0	0	0.357	0	0	0.105	0.4
OLFM3	OPTN	9606.ENSP00000345192	9606.ENSP00000368022	0	0	0	0	0	0	0	0.52	0.52
OPTN	WDFY3	9606.ENSP00000368022	9606.ENSP00000295888	0	0	0	0	0	0.063	0	0.556	0.567
OPTN	UBQLN2	9606.ENSP00000368022	9606.ENSP00000345195	0	0	0	0	0.062	0	0	0.806	0.81
OPTN	RAB11FIP2	9606.ENSP00000368022	9606.ENSP00000347839	0	0	0	0	0	0	0	0.667	0.667
OPTN	UBD	9606.ENSP00000368022	9606.ENSP00000366249	0	0	0	0	0	0	0	0.51	0.51
OPTN	TMEM106B	9606.ENSP00000368022	9606.ENSP00000379901	0	0	0	0	0	0	0	0.413	0.412
PANK2	SMG7	9606.ENSP00000313377	9606.ENSP00000425133	0	0	0	0	0	0	0	0.431	0.431
PANK2	RNF24	9606.ENSP00000313377	9606.ENSP00000388550	0	0	0	0	0	0	0	0.784	0.784
PCDH17	PRR20D	9606.ENSP00000367151	9606.ENSP00000392407	0	0	0	0	0	0	0	0.459	0.459
PEBP1	SOS1	9606.ENSP00000261313	9606.ENSP00000387784	0	0	0	0	0.062	0.175	0	0.342	0.446
PEG10	SLC38A4	9606.ENSP00000418944	9606.ENSP00000389843	0	0	0	0	0.062	0	0	0.539	0.549
PHIP	SH3BGRL2	9606.ENSP00000275034	9606.ENSP00000358853	0	0	0	0	0	0	0	0.438	0.438
PIGR	RAB11FIP2	9606.ENSP00000348888	9606.ENSP00000347839	0	0	0	0	0	0	0	0.585	0.585
PIK3C2A	TEAD1	9606.ENSP00000265970	9606.ENSP00000435233	0	0	0	0	0.065	0.103	0	0.36	0.416
PIK3C2A	SOCS3	9606.ENSP00000265970	9606.ENSP00000330341	0	0	0	0	0	0.065	0.54	0.074	0.566
POLR1A	RBM28	9606.ENSP00000263857	9606.ENSP00000223073	0	0	0	0	0.85	0.391	0	0	0.905
POLR1A	RPS29	9606.ENSP00000263857	9606.ENSP00000379339	0.111	0	0	0	0.159	0.248	0	0.161	0.465
POLR1A	RNF14	9606.ENSP00000263857	9606.ENSP00000378028	0	0	0	0	0	0	0	0.475	0.475
POLR1A	POLR3D	9606.ENSP00000263857	9606.ENSP00000380904	0	0	0	0	0.143	0.346	0	0.648	0.785
POLR3D	RBM28	9606.ENSP00000380904	9606.ENSP00000223073	0	0	0	0	0.477	0	0	0	0.477
POLR3D	POU2F1	9606.ENSP00000380904	9606.ENSP00000356840	0	0	0	0	0	0	0.6	0.18	0.658
POLR3D	TAOK3	9606.ENSP00000380904	9606.ENSP00000376317	0	0	0	0	0	0	0	0.586	0.586
POPDC2	RHBDD1	9606.ENSP00000264231	9606.ENSP00000375914	0	0	0	0	0	0	0	0.49	0.49
POPDC2	SLC8A1	9606.ENSP00000264231	9606.ENSP00000384763	0	0	0	0	0.065	0.176	0	0.442	0.533
POU2F1	TEAD1	9606.ENSP00000356840	9606.ENSP00000435233	0	0	0	0	0.062	0.27	0	0.221	0.42
PPARA	SCARB1	9606.ENSP00000385523	9606.ENSP00000261693	0	0	0	0	0	0	0	0.601	0.601
PPARA	PRDM16	9606.ENSP00000385523	9606.ENSP00000270722	0	0	0	0	0	0.076	0	0.72	0.731
PPARA	SOCS3	9606.ENSP00000385523	9606.ENSP00000330341	0	0	0	0	0	0	0	0.454	0.454
PPARA	RUNX2	9606.ENSP00000385523	9606.ENSP00000360493	0	0	0	0	0	0.152	0	0.362	0.435
PPP2R2A	SMG7	9606.ENSP00000325074	9606.ENSP00000425133	0	0	0	0	0.088	0	0.6	0.069	0.63
PRR20D	PRR20E	9606.ENSP00000392407	9606.ENSP00000404281	0	0	0	0.986	0.771	0	0	0	0.771
PSMA5	UBE2L3	9606.ENSP00000271308	9606.ENSP00000400906	0	0	0	0	0.165	0.163	0	0.218	0.407
PSMA5	UBQLN2	9606.ENSP00000271308	9606.ENSP00000345195	0	0	0	0	0.056	0.372	0	0.083	0.409
PSMA5	UBD	9606.ENSP00000271308	9606.ENSP00000366249	0	0	0	0	0.065	0.176	0.6	0.078	0.677
PSMA5	SHFM1	9606.ENSP00000271308	9606.ENSP00000481021	0	0	0	0	0.073	0	0.8	0	0.806
PSMA5	RUNX2	9606.ENSP00000271308	9606.ENSP00000360493	0	0	0	0	0	0	0.9	0.058	0.901
PSMA5	UBA52	9606.ENSP00000271308	9606.ENSP00000388107	0	0	0	0	0.062	0.871	0.9	0.155	0.988
PTGIS	VGLL3	9606.ENSP00000244043	9606.ENSP00000381436	0	0	0	0	0.107	0	0	0.363	0.408
PTN	RUNX2	9606.ENSP00000341170	9606.ENSP00000360493	0	0	0	0	0	0	0	0.46	0.46
RAB2A	RABGAP1	9606.ENSP00000262646	9606.ENSP00000362751	0	0	0	0	0.062	0.15	0	0.385	0.467
RAB2A	TBC1D4	9606.ENSP00000262646	9606.ENSP00000366863	0	0	0	0	0	0.078	0	0.63	0.644
RABGAP1	RALGPS1	9606.ENSP00000362751	9606.ENSP00000259351	0	0	0	0	0.064	0.103	0	0.478	0.523
RABGAP1	SMG7	9606.ENSP00000362751	9606.ENSP00000425133	0	0	0	0	0.052	0.4	0	0	0.406
RBM28	RPS29	9606.ENSP00000223073	9606.ENSP00000379339	0	0	0	0	0.123	0	0	0.396	0.448
REL	SRF	9606.ENSP00000295025	9606.ENSP00000265354	0	0	0	0	0	0.27	0	0.227	0.411
REL	UACA	9606.ENSP00000295025	9606.ENSP00000314556	0	0	0	0	0	0.353	0	0.122	0.408
REL	SOCS3	9606.ENSP00000295025	9606.ENSP00000330341	0	0	0	0	0	0.27	0	0.285	0.455
REL	XIAP	9606.ENSP00000295025	9606.ENSP00000360242	0	0	0	0	0.062	0	0	0.468	0.48
REL	UBE2L3	9606.ENSP00000295025	9606.ENSP00000400906	0	0	0	0	0	0.138	0	0.449	0.506
REL	UBA52	9606.ENSP00000295025	9606.ENSP00000388107	0	0	0	0	0	0	0.9	0.072	0.903
RNASE2	RNASE3	9606.ENSP00000303276	9606.ENSP00000302324	0	0	0	0.968	0.954	0	0	0.912	0.955
RNF115	UBE2D4	9606.ENSP00000463650	9606.ENSP00000222402	0	0	0	0	0.062	0.72	0	0.055	0.73
RNF14	UBE2D4	9606.ENSP00000378028	9606.ENSP00000222402	0	0	0	0	0	0.495	0	0.058	0.504
RNF14	ZNF322	9606.ENSP00000378028	9606.ENSP00000482607	0	0	0	0	0	0.057	0	0.39	0.4
RNF14	UBE2L3	9606.ENSP00000378028	9606.ENSP00000400906	0	0	0	0	0	0.776	0	0.484	0.879
RNF24	SLC2A9	9606.ENSP00000388550	9606.ENSP00000264784	0	0	0	0	0.062	0	0	0.458	0.47
ROBO1	SEMA3D	9606.ENSP00000420321	9606.ENSP00000284136	0	0	0	0	0.073	0	0	0.482	0.5
ROBO1	SOS1	9606.ENSP00000420321	9606.ENSP00000387784	0	0	0	0	0	0.212	0.6	0.328	0.77
ROBO1	UBA52	9606.ENSP00000420321	9606.ENSP00000388107	0	0	0	0	0	0	0.9	0	0.9
ROBO1	SRGAP2	9606.ENSP00000420321	9606.ENSP00000459615	0	0	0	0	0.062	0.663	0.8	0.746	0.981
RPS29	ZC3H15	9606.ENSP00000379339	9606.ENSP00000338788	0	0	0	0	0.59	0	0	0	0.59
RPS29	UBD	9606.ENSP00000379339	9606.ENSP00000366249	0	0	0	0	0.152	0.369	0	0.058	0.451
RPS29	UBA52	9606.ENSP00000379339	9606.ENSP00000388107	0	0	0	0	0.94	0.987	0.54	0.527	0.999
RUNX2	ZFYVE21	9606.ENSP00000360493	9606.ENSP00000216602	0	0	0	0	0	0	0	0.419	0.419
RUNX2	SFRP1	9606.ENSP00000360493	9606.ENSP00000220772	0	0	0	0	0	0	0	0.459	0.459
RUNX2	SRF	9606.ENSP00000360493	9606.ENSP00000265354	0	0	0	0	0	0	0	0.497	0.497
RUNX2	SMAD6	9606.ENSP00000360493	9606.ENSP00000288840	0	0	0	0	0	0.345	0.9	0.914	0.993
RUNX2	TEAD1	9606.ENSP00000360493	9606.ENSP00000435233	0	0	0	0	0	0	0	0.431	0.432
RUNX2	SNRNP70	9606.ENSP00000360493	9606.ENSP00000472998	0	0	0	0	0	0	0	0.445	0.445
RUNX2	ST6GAL2	9606.ENSP00000360493	9606.ENSP00000386942	0	0	0	0	0	0	0	0.451	0.451
RUNX2	SMAD9	9606.ENSP00000360493	9606.ENSP00000369154	0	0	0	0	0	0.078	0	0.463	0.484
RUNX2	TNMD	9606.ENSP00000360493	9606.ENSP00000362122	0	0	0	0	0	0	0	0.539	0.539
RUNX2	SOX6	9606.ENSP00000360493	9606.ENSP00000379644	0	0	0	0	0	0	0	0.589	0.589
RUNX2	SHFM1	9606.ENSP00000360493	9606.ENSP00000481021	0	0	0	0	0	0	0.9	0	0.9
RUNX2	UBA52	9606.ENSP00000360493	9606.ENSP00000388107	0	0	0	0	0	0	0.9	0	0.9
SELK	SRF	9606.ENSP00000418813	9606.ENSP00000265354	0	0	0	0	0	0	0	0.439	0.439
SETD7	SRF	9606.ENSP00000274031	9606.ENSP00000265354	0	0	0	0	0.051	0	0	0.41	0.416
SHFM1	UBQLN2	9606.ENSP00000481021	9606.ENSP00000345195	0	0	0	0	0	0.27	0	0.34	0.497
SHFM1	UBD	9606.ENSP00000481021	9606.ENSP00000366249	0	0	0	0	0	0	0.6	0.084	0.617
SHFM1	UBA52	9606.ENSP00000481021	9606.ENSP00000388107	0	0	0	0	0.059	0	0.9	0	0.901
SLAIN2	WIPF2	9606.ENSP00000264313	9606.ENSP00000320924	0	0	0	0	0	0	0	0.453	0.453
SLC16A10	SLC1A6	9606.ENSP00000357844	9606.ENSP00000221742	0	0	0	0	0	0	0	0.614	0.614
SLC16A10	SLCO1A2	9606.ENSP00000357844	9606.ENSP00000305974	0	0	0	0	0.055	0	0	0.567	0.573
SLC16A10	SLC38A4	9606.ENSP00000357844	9606.ENSP00000389843	0	0	0	0	0.06	0	0	0.4	0.411
SLC1A6	SLC36A4	9606.ENSP00000221742	9606.ENSP00000317382	0	0	0	0	0.064	0.078	0	0.396	0.433
SLC1A6	TMEM27	9606.ENSP00000221742	9606.ENSP00000369699	0	0	0	0	0	0	0	0.536	0.536
SLC1A6	SLC38A4	9606.ENSP00000221742	9606.ENSP00000389843	0	0	0	0	0.064	0.066	0	0.519	0.542
SLC22A11	SLCO1B3	9606.ENSP00000301891	9606.ENSP00000261196	0	0	0	0	0.063	0	0	0.605	0.614
SLC22A11	SLC2A9	9606.ENSP00000301891	9606.ENSP00000264784	0	0	0	0	0.051	0.058	0	0.846	0.851
SLC22A11	SLCO1A2	9606.ENSP00000301891	9606.ENSP00000305974	0	0	0	0	0.062	0	0	0.648	0.656
SLC36A4	SLC38A4	9606.ENSP00000317382	9606.ENSP00000389843	0	0	0	0	0.062	0.062	0	0.393	0.42
SLCO1A2	STS	9606.ENSP00000305974	9606.ENSP00000217961	0	0	0	0	0	0	0	0.405	0.405
SMAD6	SMAD9	9606.ENSP00000288840	9606.ENSP00000369154	0	0	0	0.655	0.062	0.155	0.8	0.74	0.871
SNAP25	SYNGR3	9606.ENSP00000254976	9606.ENSP00000248121	0	0	0	0	0.203	0	0	0.417	0.516
SNAP25	TMEM27	9606.ENSP00000254976	9606.ENSP00000369699	0	0	0	0	0	0	0	0.634	0.635
SRD5A3	UGT2A3	9606.ENSP00000264228	9606.ENSP00000251566	0	0	0	0	0	0	0.65	0	0.65
SRF	TEAD1	9606.ENSP00000265354	9606.ENSP00000435233	0	0	0	0	0.062	0.529	0	0.512	0.766
TAOK1	TAOK3	9606.ENSP00000261716	9606.ENSP00000376317	0	0	0	0.976	0.062	0	0.9	0.698	0.903
TEAD1	VGLL3	9606.ENSP00000435233	9606.ENSP00000381436	0	0	0	0	0.093	0.418	0	0.836	0.906
TMEM106B	UBQLN2	9606.ENSP00000379901	9606.ENSP00000345195	0	0	0	0	0.088	0	0	0.501	0.525
UBA52	UBE2D4	9606.ENSP00000388107	9606.ENSP00000222402	0	0	0	0	0.062	0.389	0.6	0.119	0.771
UBA52	UBQLN2	9606.ENSP00000388107	9606.ENSP00000345195	0	0	0	0	0.183	0.4	0	0.139	0.541
UBA52	XIAP	9606.ENSP00000388107	9606.ENSP00000360242	0	0	0	0	0	0	0.9	0.076	0.903
UBA52	UBD	9606.ENSP00000388107	9606.ENSP00000366249	0	0	0	0.716	0.183	0.533	0	0.327	0.635
UBD	ZNF436	9606.ENSP00000366249	9606.ENSP00000313582	0	0	0	0	0.062	0.077	0	0.417	0.451
UBD	UBQLN2	9606.ENSP00000366249	9606.ENSP00000345195	0	0	0	0	0.062	0.247	0	0.391	0.532
UBD	UBE2L3	9606.ENSP00000366249	9606.ENSP00000400906	0	0	0	0	0	0.182	0	0.403	0.491
UBE2L3	XIAP	9606.ENSP00000400906	9606.ENSP00000360242	0	0	0	0	0	0.324	0	0.186	0.426
ZC3H12B	ZC3H15	9606.ENSP00000340839	9606.ENSP00000338788	0	0	0	0	0.063	0	0	0.517	0.528
ZNF561	ZNF562	9606.ENSP00000303915	9606.ENSP00000410734	0	0	0	0.981	0.077	0.492	0	0	0.511
